# Supplementary material for: Proteins Involved in Platelet Signaling Are Differentially Regulated in Acute Coronary Syndrome: A Proteomic Study
Source: PLOS journal article supplement (doi:10.1371/journal.pone.0013404), 2010-10-14
Supplement: S1 (10.1371/journal.pone.0013404.s001) [file journal.pone.0013404.s001]

**Figure S1. Follow-up.**

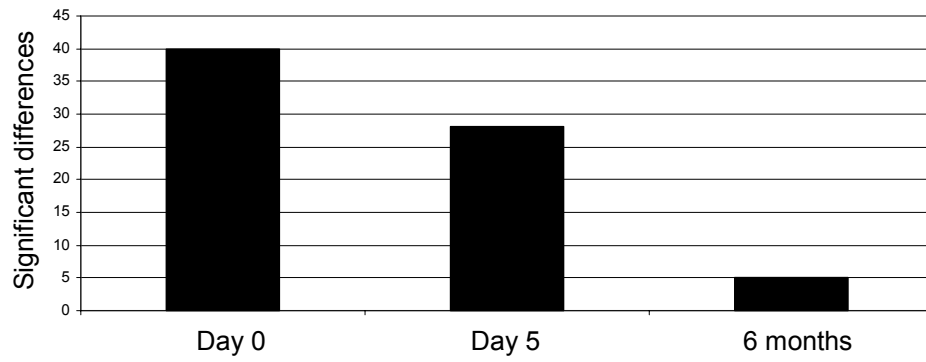

Platelet protein differences between NSTE-ACS and SCAD patients decreased with time after the acute event.
